# Supplementary material
Source: publisher figshare collection journal article supplement (https://acs.figshare.com/ndownloader/files/17915336)

## $^1\text{H}$ NMR spectrum of pyrimetazole

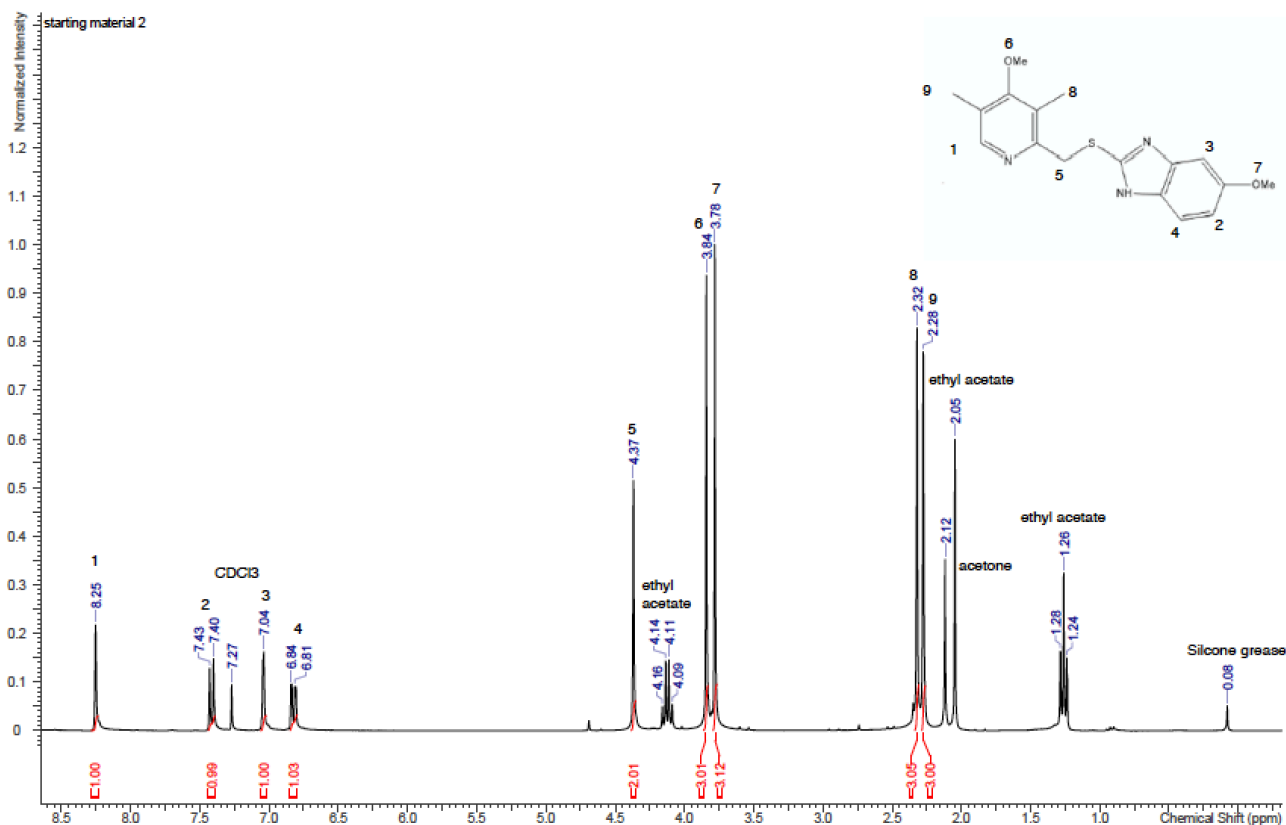

## $^1\text{H}$ NMR spectrum of the crude product from a representative oxidation reaction

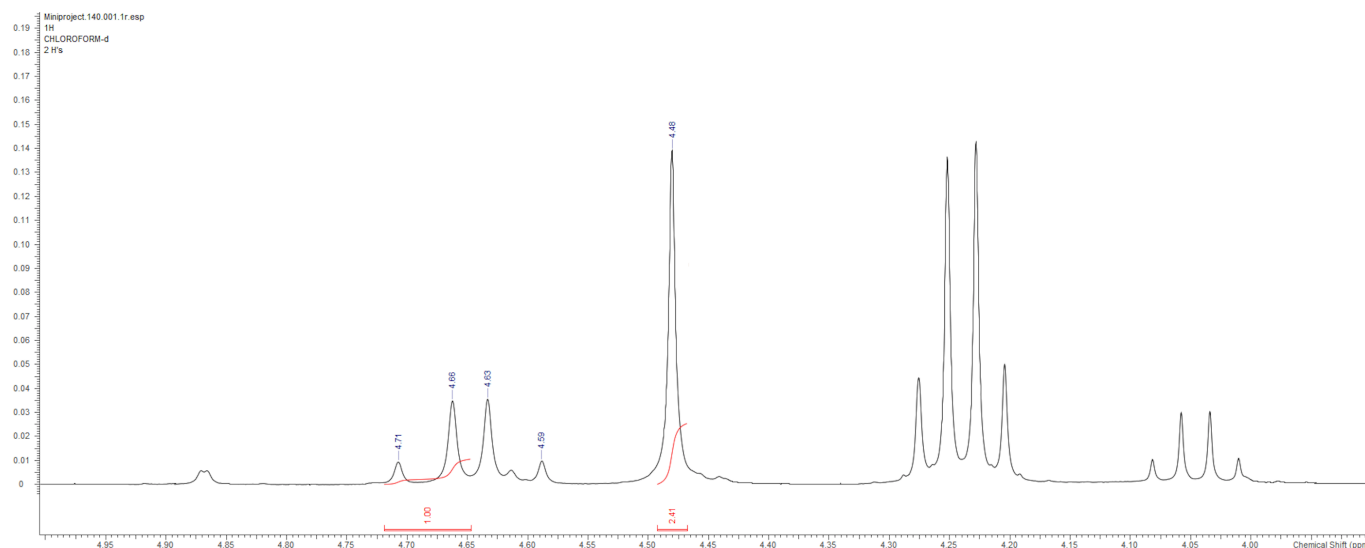

Supplement: Supplementary file 1 [file 17915336]
